# Supplementary material
Source: PubMed Central journal article supplement (PMC5378108)
Supplement: 1489file002.pdf [file 1489file002.pdf]

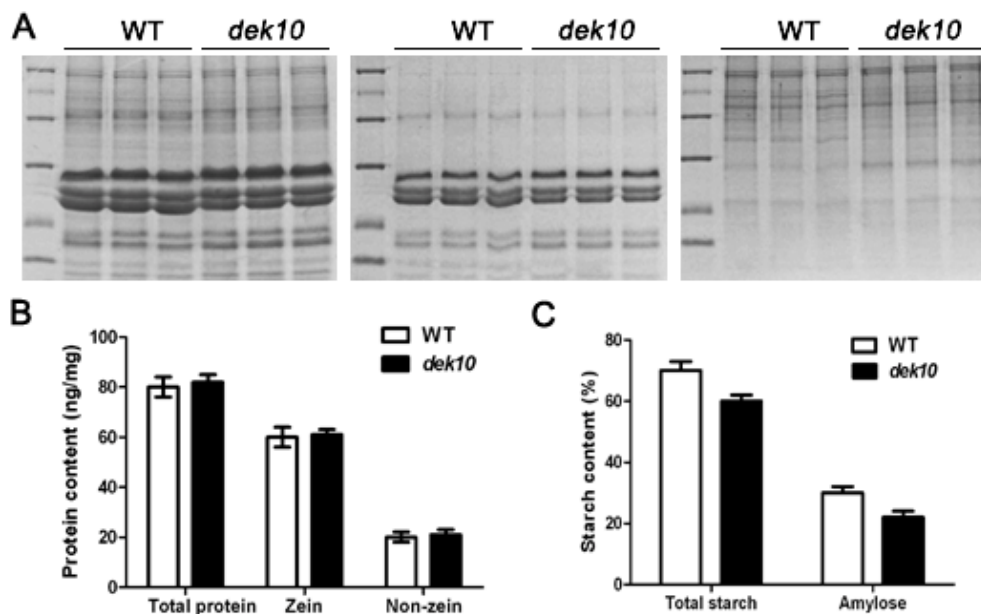

**Figure S1. Biochemical analysis of WT and *dek10* endosperm.**

**A.** SDS-PAGE analysis of total, zein, and nonzein proteins from WT and *dek10* mature endosperm.

**B.** Comparison of total, zein, and nonzein proteins from *dek10* and WT mature endosperm. The measurements were done on per mg of dried endosperm. Values are the mean values with standard errors,  $n=3$  individuals.

**C.** Comparison of total starch and amylose content in WT and *dek10* mature endosperm. The measurements were done on per mg of dried endosperm. Values are the mean values with standard errors,  $n=3$  individuals.

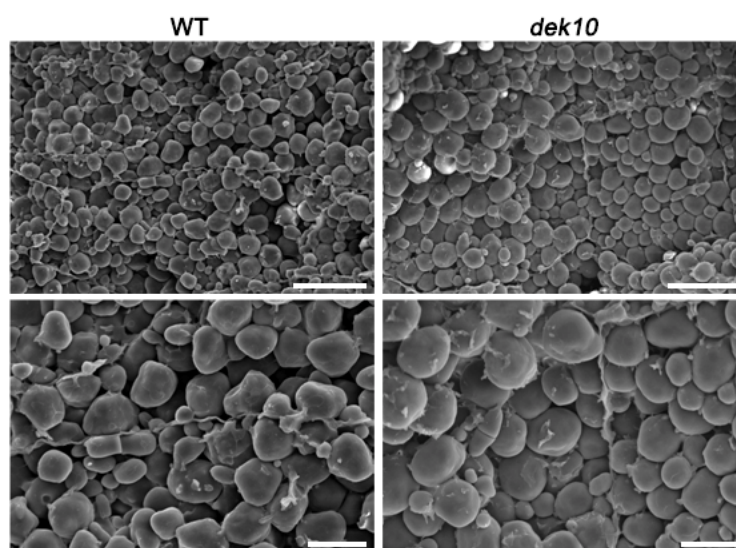

**Figure S2. Scanning electron microscopy analysis of the peripheral regions of mature WT and *dek10* endosperm. Bars = 50  $\mu$ m (top), Lower, Bars=20  $\mu$ m (bottom).**

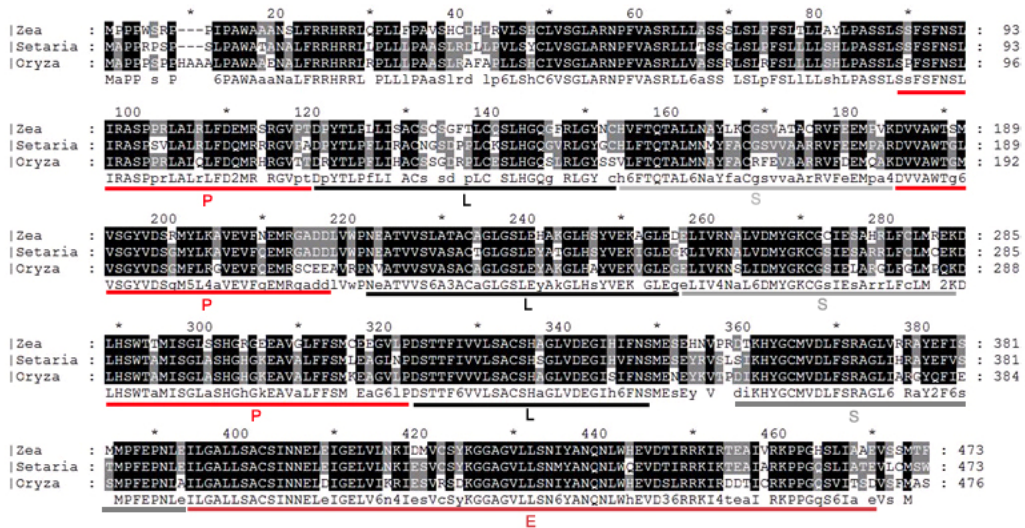

Figure S3. Alignment of Dek10 full length protein sequence and homologue protein sequences from *Setaria italica* and *Oryza sativa*.

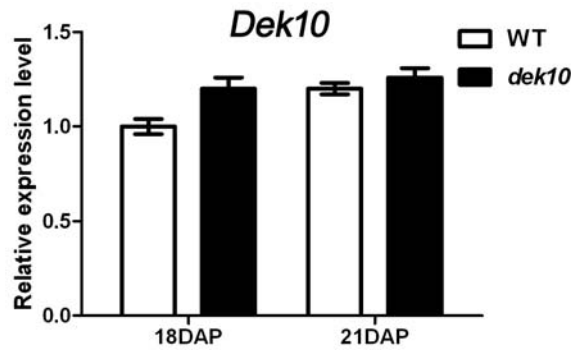

Figure S4. qRT-PCR comparing expression level of *Dek10* gene in the 18 DAP and 21 DAP *dek10* and WT kernels. Ubiquitin was used as internal control. Values are the mean values with standard errors,  $n=3$  individuals.

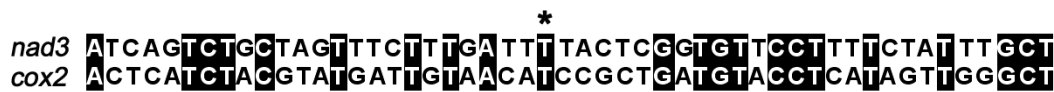

Figure S5. Alignment of the Dek10 target sequences in *nad3* and *cox2*.

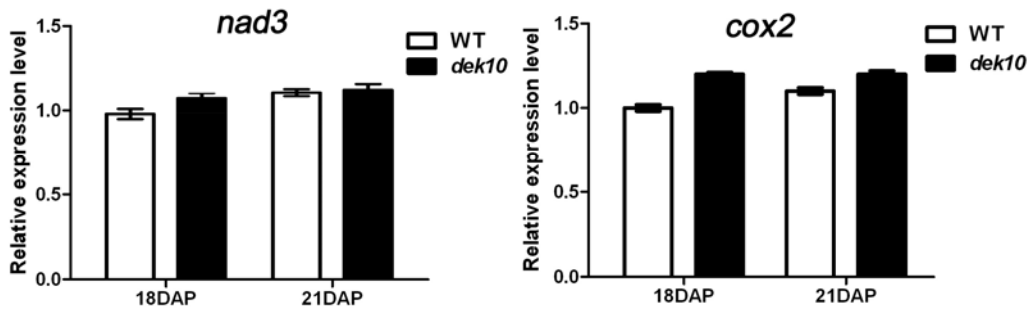

Figure S6. qRT-PCR comparing expression level of *nad3* and *cox2* gene in the 18 DAP and 21 DAP *dek10* and WT kernels. Ubiquitin was used as internal control. Values are the mean values with standard errors,  $n=3$  individuals.

**Table S1. Gene ontology classifications of DEGs with functional annotation.**

| GO ID                  | P-Value  | Gene          | Description                                                              | Fold change | P-Value  |
|------------------------|----------|---------------|--------------------------------------------------------------------------|-------------|----------|
| GO:0005740             |          |               |                                                                          |             |          |
| Mitochondrial envelope | 5.00E-18 | GRMZM2G157018 | ATPase, F0 complex, subunit D<br>Cytochrome c oxidase copper             | 3.53        | 1.62E-65 |
|                        |          | GRMZM2G116517 | chaperone                                                                | 2.14        | 3.95E-06 |
|                        |          | GRMZM2G051613 | ETC complex I subunit<br>Mitochondrial inner membrane                    | 2.68        | 1.47E-11 |
|                        |          | GRMZM2G144101 | translocase complex                                                      | 2.82        | 1.68E-15 |
|                        |          | GRMZM2G540403 | Ribosomal protein L4/L1e                                                 | 2.04        | 4.92E-04 |
|                        |          | GRMZM2G135186 | Adenine nucleotide translocator 1<br>ETC complex I subunit conserved     | 2.84        | 8.00E-22 |
|                        |          | GRMZM2G105207 | region                                                                   | 2.51        | 2.79E-05 |
| AC194341.4_FG002       |          | GRMZM2G010933 | ATPase, F0 complex, subunit G<br>Cytochrome c oxidase 17                 | 2.91        | 4.80E-20 |
|                        |          | GRMZM2G157758 | ATPase, F1 complex, epsilon subunit<br>Mitochondrial inner membrane      | 3.41        | 7.05E-19 |
|                        |          | GRMZM2G112640 | translocase complex, subunit Tim17/22                                    | 2.22        | 3.44E-04 |
|                        |          | GRMZM2G006704 | Cytochrome c oxidase subunit Vc<br>Mitochondrial inner membrane          | 2.32        | 3.66E-09 |
|                        |          | GRMZM2G321404 | translocase complex, subunit Tim17/22                                    | 3.85        | 1.28E-03 |
|                        |          | GRMZM2G042078 | ATPase, F0 complex, subunit G                                            | 2.86        | 2.11E-07 |
|                        |          | GRMZM2G152827 | Mitochondrial carrier domain                                             | 4.72        | 7.44E-19 |
|                        |          | GRMZM2G064753 | Cytochrome c oxidase, subunit Vb                                         | 2.95        | 3.52E-11 |
|                        |          | GRMZM2G120876 | Porin, eukaryotic type                                                   | 3.76        | 2.55E-08 |
|                        |          | GRMZM2G155021 | Porin, eukaryotic type<br>Mitochondrial inner membrane                   | 2.31        | 9.96E-04 |
|                        |          | GRMZM2G156848 | translocase complex                                                      | 2.04        | 8.66E-06 |
|                        |          | GRMZM2G143234 | ATPase, F1 complex, epsilon subunit<br>Ubiquinol-cytochrome C reductase, | 2.71        | 5.59E-17 |
|                        |          | GRMZM2G171476 | UQCRX/QCR9-like                                                          | 3.05        | 1.12E-15 |
|                        |          | GRMZM2G146670 | Porin, eukaryotic type                                                   | 3.66        | 2.65E-12 |
|                        |          | GRMZM2G150616 | Porin, eukaryotic type<br>Mitochondrial inner membrane                   | 3.90        | 2.84E-19 |
|                        |          | GRMZM2G038375 | translocase complex, subunit Tim17/22                                    | 2.61        | 7.32E-07 |
|                        |          | GRMZM2G125669 | Alternative oxidase 2<br>Mitochondrial inner membrane                    | 366.17      | 3.65E-24 |
|                        |          | GRMZM2G058432 | translocase complex<br>Ubiquinol-cytochrome C reductase,                 | 6.04        | 1.89E-28 |
|                        |          | GRMZM2G064896 | UQCRX/QCR9-like                                                          | 2.95        | 3.99E-11 |
|                        |          | GRMZM2G048013 | Cytochrome c oxidase, subunit VIIa                                       | 2.48        | 3.88E-10 |
|                        |          | GRMZM2G412296 | Cytochrome c oxidase, subunit VIIa<br>Mitochondrial inner membrane       | 2.68        | 1.27E-04 |
|                        |          | GRMZM5G801241 | translocase complex                                                      | 2.61        | 1.23E-08 |

|                      |          |                  |                                                                             |       |           |
|----------------------|----------|------------------|-----------------------------------------------------------------------------|-------|-----------|
|                      |          | GRMZM2G071071    | Ras GTPase;EF hand associated<br>Plant specific mitochondrial import        | 9.36  | 5.82E-60  |
|                      |          | GRMZM2G100402    | receptor subunit TOM20<br>Mitochondrial inner membrane                      | 2.32  | 7.03E-04  |
|                      |          | GRMZM2G167463    | translocase complex                                                         | 4.20  | 4.96E-08  |
|                      |          | GRMZM2G015401    | Mitochondrial carrier domain<br>Mitochondrial inner membrane                | 4.00  | 1.28E-03  |
|                      |          | GRMZM2G319878    | translocase complex<br>Mitochondrial inner membrane                         | 5.54  | 2.62E-08  |
|                      |          | GRMZM2G103771    | translocase complex, subunit Tim17/22                                       | 0.19  | 3.63E-15  |
|                      |          | GRMZM2G134738    | Cytochrome c oxidase, subunit Vb                                            | 4.94  | 1.77E-18  |
|                      |          | GRMZM2G069229    | ATPase, F0 complex, subunit G<br>Mitochondrial brown fat uncoupling         | 5.16  | 4.81E-04  |
|                      |          | GRMZM2G000510    | protein                                                                     | 2.22  | 2.21E-11  |
|                      |          | GRMZM2G024823    | Mitochondrial carrier domain                                                | 4.27  | 4.72E-04  |
|                      |          | GRMZM2G067877    | Mitochondrial carrier domain                                                | 3.71  | 3.01E-12  |
|                      |          | GRMZM2G149480    | Mitochondrial carrier domain                                                | 4.19  | 1.00E-04  |
|                      |          | GRMZM2G122481    | Cytochrome c oxidase subunit Vc                                             | 3.45  | 6.71E-04  |
|                      |          | GRMZM2G018417    | Porin, eukaryotic type                                                      | 2.30  | 4.93E-04  |
|                      |          | GRMZM2G115049    | Porin, eukaryotic type                                                      | 28.03 | 2.31E-181 |
|                      |          | GRMZM2G018941    | ETC complex I subunit<br>Mitochondrial inner membrane                       | 2.37  | 2.78E-12  |
|                      |          | GRMZM2G064600    | translocase complex, subunit Tim17/22                                       | 6.59  | 3.60E-08  |
| GO:0015078           |          |                  |                                                                             |       |           |
| Hydrogen ion         |          |                  |                                                                             |       |           |
| transmembrane        |          |                  |                                                                             |       |           |
| transporter activity | 1.30E-13 |                  |                                                                             |       |           |
|                      |          | GRMZM2G451281    | Ubiquinol-cytochrome C reductase<br>hinge                                   | 2.41  | 3.40E-11  |
|                      |          | GRMZM2G157018    | ATPase, F0 complex, subunit D<br>Ubiquinol-cytochrome C reductase,          | 3.53  | 1.62E-65  |
|                      |          | GRMZM2G064896    | UQCRX/QCR9-like                                                             | 2.95  | 3.99E-11  |
|                      |          | GRMZM2G070360    | ATPase, V1/A1 complex, subunit E                                            | 2.08  | 8.66E-06  |
|                      |          | GRMZM2G171664    | Rieske iron-sulphur protein, C-terminal<br>Ubiquinol-cytochrome C reductase | 2.55  | 6.63E-07  |
|                      |          | GRMZM2G165483    | hinge<br>Cytochrome d ubiquinol oxidase,                                    | 2.73  | 1.16E-04  |
|                      |          | GRMZM2G170457    | 14kDa subunit                                                               | 3.99  | 2.93E-25  |
|                      |          | GRMZM2G131434    | Cytochrome c oxidase, subunit VIb                                           | 3.53  | 3.44E-04  |
|                      |          | GRMZM2G131431    | ATPase, V0 complex, subunit E<br>ATPase, V0 complex, proteolipid            | 2.23  | 8.95E-07  |
|                      |          | GRMZM2G101020    | subunit C                                                                   | 2.30  | 2.04E-04  |
|                      |          | AC194341.4_FG002 | ATPase, F0 complex, subunit G<br>ATPase, F1 complex, gamma subunit          | 2.91  | 4.80E-20  |
|                      |          | GRMZM2G009638    | conserved site                                                              | 2.65  | 9.93E-17  |
|                      |          | GRMZM2G157758    | ATPase, F1 complex, epsilon subunit                                         | 3.41  | 7.05E-19  |

|                  |          |                  |                                                                          |      |          |
|------------------|----------|------------------|--------------------------------------------------------------------------|------|----------|
|                  |          | GRMZM2G006704    | Cytochrome c oxidase subunit Vc<br>ATPase, F1 complex, delta/epsilon     | 2.32 | 3.66E-09 |
|                  |          | GRMZM2G138220    | subunit                                                                  | 2.71 | 4.95E-05 |
|                  |          | GRMZM2G042078    | ATPase, F0 complex, subunit G<br>ATPase, F1/V1/A1 complex, alpha/beta    | 2.86 | 2.11E-07 |
|                  |          | GRMZM2G021331    | subunit                                                                  | 2.68 | 5.04E-11 |
|                  |          | GRMZM2G064753    | Cytochrome c oxidase, subunit Vb<br>Ubiquinol-cytochrome C reductase     | 2.95 | 3.52E-11 |
|                  |          | GRMZM2G152952    | hinge<br>ATPase, F1/V1/A1 complex, alpha/beta                            | 2.52 | 1.13E-06 |
|                  |          | GRMZM2G113408    | subunit, N-terminal<br>ATPase, F1 complex, gamma subunit                 | 3.24 | 8.88E-32 |
|                  |          | GRMZM2G321725    | conserved site                                                           | 2.32 | 3.62E-09 |
|                  |          | GRMZM2G143234    | ATPase, F1 complex, epsilon subunit<br>Ubiquinol-cytochrome C reductase, | 2.71 | 5.59E-17 |
|                  |          | GRMZM2G171476    | UQCRX/QCR9-like                                                          | 3.05 | 1.12E-15 |
|                  |          | GRMZM2G401139    | UcrQ; Cytochrome b-c1 complex                                            | 2.60 | 5.24E-13 |
|                  |          | GRMZM2G023194    | Rieske iron-sulphur protein, C-terminal                                  | 2.26 | 4.96E-05 |
|                  |          | GRMZM2G048013    | Cytochrome c oxidase, subunit VIIa<br>Cytochrome d ubiquinol oxidase,    | 2.48 | 3.88E-10 |
|                  |          | GRMZM2G318346    | 14kDa subunit                                                            | 3.47 | 4.35E-07 |
|                  |          | GRMZM2G067707    | UcrQ; Cytochrome b-c1 complex<br>ATPase, F1 complex, OSCP/delta          | 2.24 | 5.18E-09 |
|                  |          | GRMZM2G156068    | subunit                                                                  | 3.88 | 6.54E-68 |
|                  |          | GRMZM2G412296    | Cytochrome c oxidase, subunit VIIa<br>ATPase, F1 complex, gamma subunit  | 2.68 | 1.27E-04 |
|                  |          | GRMZM2G069458    | domain<br>ATPase, F1/V1/A1 complex, alpha/beta                           | 3.13 | 4.54E-17 |
|                  |          | GRMZM2G041275    | subunit, N-terminal<br>ATPase, F1 complex, delta/epsilon                 | 3.38 | 5.79E-11 |
|                  |          | GRMZM2G171628    | subunit                                                                  | 2.83 | 5.28E-17 |
|                  |          | GRMZM2G067417    | Cytochrome c oxidase, subunit VIb<br>ATPase, V0 complex, proteolipid     | 3.94 | 1.05E-19 |
|                  |          | GRMZM2G177005    | subunit C                                                                | 2.19 | 3.48E-06 |
|                  |          | GRMZM2G134738    | Cytochrome c oxidase, subunit Vb                                         | 4.94 | 1.77E-18 |
|                  |          | GRMZM2G069229    | ATPase, F0 complex, subunit G                                            | 5.16 | 4.81E-04 |
|                  |          | GRMZM2G152925    | Cytochrome c oxidase, subunit VIb                                        | 2.16 | 1.59E-05 |
|                  |          | AC214350.3_FG007 | Rieske iron-sulphur protein, C-terminal                                  | 2.26 | 1.21E-05 |
|                  |          | GRMZM2G021635    | ATPase, V1/A1 complex, subunit D                                         | 3.32 | 3.44E-04 |
|                  |          | GRMZM2G122481    | Cytochrome c oxidase subunit Vc                                          | 3.45 | 6.71E-04 |
|                  |          | GRMZM2G118019    | Na <sup>+</sup> /H <sup>+</sup> exchanger                                | 0.02 | 2.04E-13 |
| GO:0015992       |          |                  |                                                                          |      |          |
| proton transport | 7.00E-06 | GRMZM2G157018    | ATPase, F0 complex, subunit D                                            | 3.53 | 1.62E-65 |
|                  |          | GRMZM2G070360    | ATPase, V1/A1 complex, subunit E                                         | 2.08 | 8.66E-06 |

|                     |          |                  |                                          |      |          |
|---------------------|----------|------------------|------------------------------------------|------|----------|
|                     |          | GRMZM2G131431    | ATPase, V0 complex, subunit E            | 2.23 | 8.95E-07 |
|                     |          |                  | ATPase, V0 complex, proteolipid          |      |          |
|                     |          | GRMZM2G101020    | subunit C                                | 2.30 | 2.04E-04 |
|                     |          | AC194341.4_FG002 | ATPase, F0 complex, subunit G            | 2.91 | 4.80E-20 |
|                     |          |                  | ATPase, F1 complex, gamma subunit        |      |          |
|                     |          | GRMZM2G009638    | conserved site                           | 2.65 | 9.93E-17 |
|                     |          | GRMZM2G157758    | ATPase, F1 complex, epsilon subunit      | 3.41 | 7.05E-19 |
|                     |          |                  | ATPase, F1 complex, delta/epsilon        |      |          |
|                     |          | GRMZM2G138220    | subunit                                  | 2.71 | 4.95E-05 |
|                     |          | GRMZM2G042078    | ATPase, F0 complex, subunit G            | 2.86 | 2.11E-07 |
|                     |          | GRMZM2G069095    | Inorganic H <sup>+</sup> pyrophosphatase | 4.30 | 2.85E-11 |
|                     |          |                  | ATPase, F1/V1/A1 complex, alpha/beta     |      |          |
|                     |          | GRMZM2G021331    | subunit                                  | 2.68 | 5.04E-11 |
|                     |          |                  | ATPase, F1/V1/A1 complex, alpha/beta     |      |          |
|                     |          | GRMZM2G113408    | subunit                                  | 3.24 | 8.88E-32 |
|                     |          |                  | ATPase, F1 complex, gamma subunit        |      |          |
|                     |          | GRMZM2G321725    | conserved site                           | 2.32 | 3.62E-09 |
|                     |          | GRMZM2G143234    | ATPase, F1 complex, epsilon subunit      | 2.71 | 5.59E-17 |
|                     |          | GRMZM2G144372    | ATPase, V1 complex, subunit C            | 2.33 | 2.91E-04 |
|                     |          |                  | ATPase, F1 complex, OSCP/delta           |      |          |
|                     |          | GRMZM2G156068    | subunit                                  | 3.88 | 6.54E-68 |
|                     |          | GRMZM2G104419    | Inorganic H <sup>+</sup> pyrophosphatase | 4.57 | 8.11E-04 |
|                     |          |                  | ATPase, F1 complex, gamma subunit        |      |          |
|                     |          | GRMZM2G069458    | domain                                   | 3.13 | 4.54E-17 |
|                     |          |                  | ATPase, F1/V1/A1 complex, alpha/beta     |      |          |
|                     |          | GRMZM2G041275    | subunit                                  | 3.38 | 5.79E-11 |
|                     |          |                  | ATPase, F1 complex, delta/epsilon        |      |          |
|                     |          | GRMZM2G171628    | subunit                                  | 2.83 | 5.28E-17 |
|                     |          |                  | ATPase, V0 complex, proteolipid          |      |          |
|                     |          | GRMZM2G177005    | subunit C                                | 2.19 | 3.48E-06 |
|                     |          | GRMZM2G069229    | ATPase, F0 complex, subunit G            | 5.16 | 4.81E-04 |
|                     |          | GRMZM2G021635    | ATPase, V1/A1 complex, subunit D         | 3.32 | 3.44E-04 |
| GO:0006334          |          |                  |                                          |      |          |
| Nucleosome assembly | 5.40E-16 | GRMZM2G121186    | Nucleosome assembly protein (NAP)        | 2.23 | 2.97E-06 |
|                     |          |                  | Heavy metal transport/detoxification     |      |          |
|                     |          | GRMZM2G155281    | protein                                  | 3.40 | 1.91E-26 |
|                     |          | GRMZM2G047813    | Histone H2A;Histone core;Histone-fold    | 5.37 | 1.72E-12 |
|                     |          | GRMZM2G079089    | Histone H2B;Histone core;Histone-fold    | 2.10 | 1.09E-03 |
|                     |          | GRMZM2G401308    | Histone H1/H5                            | 2.19 | 6.90E-06 |
|                     |          | GRMZM2G349651    | Histone H4, conserved site               | 4.87 | 1.00E-04 |
|                     |          | GRMZM2G421279    | Histone H4, conserved site               | 3.80 | 6.93E-16 |
|                     |          | GRMZM2G151826    | Histone H2A;Histone core;Histone-fold    | 3.34 | 5.41E-04 |
|                     |          | GRMZM2G479684    | Histone H4, conserved site               | 3.37 | 2.04E-18 |
|                     |          | GRMZM2G181153    | Histone H4, conserved site               | 3.28 | 4.08E-05 |

|                                          |          |                  |                                                           |      |          |
|------------------------------------------|----------|------------------|-----------------------------------------------------------|------|----------|
|                                          |          | GRMZM2G401147    | Histone H2B;Histone core;Histone-fold                     | 3.41 | 2.79E-12 |
|                                          |          | AC191069.3_FG004 | IGR protein motif                                         | 3.85 | 8.64E-07 |
|                                          |          |                  | Ribosomal biogenesis regulatory protein                   |      |          |
|                                          |          | GRMZM2G127312    |                                                           | 2.31 | 1.44E-12 |
|                                          |          | GRMZM2G163939    | Histone H2B;Histone core;Histone-fold                     | 2.32 | 4.16E-05 |
|                                          |          | GRMZM2G003306    | Histone H2A;Histone core;Histone-fold                     | 4.49 | 2.56E-17 |
|                                          |          | GRMZM2G063896    | Histone H4, conserved site                                | 2.67 | 5.28E-04 |
|                                          |          | GRMZM2G305027    | Histone H2B;Histone core;Histone-fold                     | 2.57 | 1.62E-03 |
|                                          |          | GRMZM2G112912    | Histone H2B;Histone core;Histone-fold                     | 5.79 | 1.01E-12 |
|                                          |          | GRMZM2G034157    | Heat shock protein Hsp20                                  | 7.08 | 6.54E-26 |
|                                          |          | GRMZM2G056231    | Histone H2A;Histone core;Histone-fold                     | 4.12 | 1.80E-08 |
|                                          |          |                  | Histone core;Histone-fold;Histone H3;Longin;Synaptobrevin |      |          |
|                                          |          | GRMZM2G387076    |                                                           | 3.33 | 1.23E-09 |
|                                          |          |                  | Leucine-rich repeat;Ribosomal protein L19/L19e            |      |          |
|                                          |          | GRMZM2G450937    |                                                           | 2.85 | 1.67E-06 |
|                                          |          | GRMZM2G073275    | Histone H4, conserved site                                | 3.08 | 4.16E-10 |
|                                          |          | GRMZM2G118355    | Histone core;Histone-fold;Histone H3                      | 2.05 | 8.29E-13 |
|                                          |          | GRMZM2G106133    | Histone H1/H5                                             | 2.65 | 8.57E-05 |
|                                          |          |                  | Cyclophilin-type peptidyl-prolyl cis-trans isomerase      |      |          |
|                                          |          | GRMZM2G084521    |                                                           | 2.86 | 1.05E-10 |
|                                          |          | GRMZM2G305046    | Histone H2A;Histone core;Histone-fold                     | 9.29 | 2.95E-11 |
|                                          |          | GRMZM2G072855    | Histone H4, conserved site                                | 2.41 | 2.46E-03 |
|                                          |          | GRMZM2G472696    | Histone H2B;Histone core;Histone-fold                     | 2.41 | 1.21E-09 |
|                                          |          | GRMZM2G164020    | Histone H1/H5                                             | 2.95 | 9.87E-06 |
|                                          |          | GRMZM2G332838    | Histone H4, conserved site                                | 4.70 | 3.18E-27 |
|                                          |          | GRMZM2G071959    | Histone H2B;Histone core;Histone-fold                     | 2.47 | 4.31E-13 |
|                                          |          |                  | Ribosomal protein L19/L19e conserved site                 |      |          |
|                                          |          | GRMZM2G116135    |                                                           | 2.00 | 2.99E-05 |
|                                          |          | GRMZM2G080274    | Histone H4, conserved site                                | 3.63 | 4.18E-04 |
|                                          |          | GRMZM2G447984    | Histone core;Histone-fold;Histone H3                      | 5.37 | 5.63E-05 |
|                                          |          | AC212565.3_FG001 | Histone H4, conserved site                                | 3.14 | 6.92E-12 |
|                                          |          | GRMZM2G342515    | Histone H2B;Histone core;Histone-fold                     | 4.96 | 1.75E-08 |
|                                          |          | AC196961.2_FG003 | Histone H4, conserved site                                | 4.46 | 1.28E-03 |
|                                          |          | GRMZM2G084195    | Histone H4, conserved site                                | 4.59 | 2.08E-10 |
|                                          |          | GRMZM2G016232    | Histone H4, conserved site                                | 2.69 | 3.83E-09 |
|                                          |          | GRMZM2G051879    | Histone core;Histone-fold;Histone H3                      | 2.04 | 2.18E-12 |
|                                          |          | GRMZM2G119071    | Histone H2B;Histone core;Histone-fold                     | 6.72 | 8.87E-05 |
|                                          |          | GRMZM2G046055    | Histone H2A;Histone core;Histone-fold                     | 4.42 | 4.34E-14 |
|                                          |          | GRMZM2G304575    | Histone H2B;Histone core;Histone-fold                     | 3.52 | 5.50E-10 |
|                                          |          | GRMZM2G078314    | Histone core;Histone-fold;Histone H3                      | 4.38 | 1.53E-09 |
|                                          |          | GRMZM2G306258    | Histone H2B;Histone core;Histone-fold                     | 4.16 | 4.61E-06 |
| GO:0008652                               |          |                  | Chorismate synthase, conserved site;Chorismate synthase   |      |          |
| Cellular amino acid biosynthetic process | 6.00E-08 | GRMZM2G164562    |                                                           | 2.21 | 3.43E-05 |

---

|               |                                         |      |           |
|---------------|-----------------------------------------|------|-----------|
|               | Dihydrodipicolinate reductase,          |      |           |
| GRMZM2G090241 | N-terminal                              | 2.36 | 1.44E-03  |
| GRMZM2G013430 | Serine acetyltransferase, N-terminal    | 8.18 | 6.43E-04  |
|               | Cysteine synthase/cystathionine         |      |           |
|               | beta-synthase P-phosphate-binding       |      |           |
| GRMZM2G082185 | site                                    | 3.28 | 1.70E-03  |
| GRMZM2G161868 | Dehydrogenase, multihelical             | 3.26 | 1.92E-33  |
| GRMZM2G328893 | Cysteine synthase K/M                   | 3.63 | 8.54E-05  |
|               | RmlC-like jelly roll fold;"Acireductone |      |           |
| GRMZM2G165998 | dioxygenase, ARD"                       | 2.00 | 1.94E-05  |
|               | Pyridoxal phosphate-dependent           |      |           |
| GRMZM2G170595 | transferase                             | 2.87 | 5.71E-06  |
| GRMZM2G005887 | Cysteine synthase K/M                   | 3.43 | 3.91E-35  |
| GRMZM2G165383 | Phosphoserine phosphatase, domain 2     | 2.72 | 1.74E-04  |
|               | Aconitase/3-isopropylmalate             |      |           |
| GRMZM5G840002 | dehydratase, swivel                     | 7.57 | 2.43E-135 |
| GRMZM2G407044 | Acetolactate synthase, small subunit    | 2.24 | 4.11E-04  |
| GRMZM2G055507 | 2-isopropylmalate synthase LeuA         | 4.87 | 5.94E-05  |
|               | Histidinol dehydrogenase, conserved     |      |           |
| GRMZM2G058584 | site                                    | 2.44 | 2.36E-05  |
|               | Histidine biosynthesis HisG: ATP        |      |           |
| GRMZM2G068862 | phosphoribosyltransferase               | 2.17 | 5.61E-05  |
| GRMZM2G051219 | Glycosyl transferase, family 3          | 2.77 | 1.04E-10  |
|               | Aconitase/3-isopropylmalate             |      |           |
|               | dehydratase large subunit,              |      |           |
| GRMZM2G370852 | alpha/beta/alpha                        | 2.85 | 7.59E-21  |
|               | Isocitrate/isopropylmalate              |      |           |
| GRMZM2G104613 | dehydrogenase                           | 2.49 | 9.63E-08  |
|               | Cysteine synthase/cystathionine         |      |           |
|               | beta-synthase P-phosphate-binding       |      |           |
| GRMZM2G165622 | site                                    | 3.98 | 5.69E-07  |
|               | Histidine biosynthesis;Histidine        |      |           |
| GRMZM2G174589 | biosynthesis, HisF                      | 2.42 | 1.68E-05  |
|               | Delta 1-pyrroline-5-carboxylate         |      |           |
| GRMZM2G068665 | reductase                               | 3.69 | 1.05E-12  |
|               | Phosphoribosyl-ATP                      |      |           |
| GRMZM2G082214 | pyrophosphohydrolase-like               | 2.77 | 3.33E-05  |
| GRMZM2G537291 | 2-isopropylmalate synthase LeuA         | 2.85 | 2.57E-05  |
| GRMZM2G130332 | Diaminopimelate epimerase               | 2.11 | 9.07E-04  |
|               | Semialdehyde dehydrogenase,             |      |           |
| GRMZM2G076885 | dimerisation domain                     | 3.31 | 5.69E-05  |
| GRMZM2G010406 | Argininosuccinate synthetase            | 3.45 | 1.87E-10  |
|               | Isocitrate/isopropylmalate              |      |           |
| GRMZM5G803490 | dehydrogenase                           | 2.32 | 1.45E-05  |

---



|                             |          |                  |                                                                               |       |          |
|-----------------------------|----------|------------------|-------------------------------------------------------------------------------|-------|----------|
|                             |          | GRMZM2G141273    | Prephenate dehydratase                                                        | 3.42  | 6.71E-04 |
|                             |          | GRMZM2G124059    | Lyase 1, N-terminal<br>HAD-like<br>domain;Methylthioribulose-1-phosphate      | 3.21  | 1.02E-10 |
|                             |          | GRMZM2G574782    | dehydratase                                                                   | 2.31  | 2.11E-06 |
|                             |          | GRMZM2G048740    | Serine acetyltransferase, N-terminal<br>Pyridoxal phosphate-dependent         | 2.95  | 3.31E-06 |
|                             |          | GRMZM2G300801    | transferase, major region                                                     | 2.39  | 4.13E-05 |
| GO:0006414                  |          |                  |                                                                               |       |          |
| Translational elongation    | 2.70E-13 | GRMZM2G129804    | Translation protein SH3-like, subgroup<br>Translation elongation factor, IF5A | 2.54  | 2.84E-03 |
|                             |          | GRMZM2G113696    | C-terminal<br>Translation elongation factor                                   | 2.14  | 1.96E-24 |
|                             |          | GRMZM2G110509    | EFTu/EF1A, domain 2<br>UBA-like;Translation elongation factor                 | 2.32  | 5.15E-09 |
|                             |          | GRMZM2G095534    | EFTs/EF1B<br>Translation elongation factor                                    | 2.71  | 9.63E-06 |
|                             |          | GRMZM2G153541    | EFTu/EF1A                                                                     | 2.01  | 4.33E-28 |
|                             |          | GRMZM2G157443    | Ribosomal protein 60S                                                         | 2.23  | 1.37E-13 |
|                             |          | GRMZM2G022662    | Nucleic acid-binding, OB-fold                                                 | 2.79  | 7.85E-10 |
|                             |          | GRMZM2G102891    | Ribosomal protein 60S<br>Translation elongation factor                        | 2.02  | 4.98E-09 |
|                             |          | GRMZM2G022269    | EFTu/EF1A, domain 2<br>Translation elongation factor                          | 2.44  | 4.08E-06 |
|                             |          | AC233866.1_FG006 | EFTu/EF1A, domain 2<br>Glutathione S-transferase,<br>C-terminal-like          | 2.64  | 2.29E-18 |
|                             |          | GRMZM2G439201    | C-terminal-like                                                               | 2.30  | 2.30E-35 |
|                             |          | GRMZM2G059580    | Translation elongation factor EF1B                                            | 2.09  | 9.00E-06 |
|                             |          | GRMZM2G179976    | Ribosomal protein L10<br>Translation elongation factor                        | 2.87  | 1.79E-10 |
|                             |          | GRMZM2G313678    | EFTu/EF1A, domain 2<br>Signal recognition particle,                           | 4.13  | 2.11E-05 |
|                             |          | GRMZM2G058407    | SRP9/SRP14 subunit                                                            | 3.10  | 8.45E-04 |
|                             |          | GRMZM2G119809    | Ribosomal protein 60S                                                         | 2.09  | 3.31E-10 |
|                             |          | GRMZM2G136889    | Glu-tRNAGln amidotransferase                                                  | 2.86  | 7.46E-06 |
|                             |          | GRMZM2G075630    | Ribosomal protein 60S                                                         | 2.33  | 1.42E-10 |
|                             |          | GRMZM2G153569    | Translation elongation factor EF1B                                            | 2.16  | 4.15E-06 |
|                             |          | GRMZM2G010257    | Ribosomal protein 60S                                                         | 3.18  | 1.72E-07 |
|                             |          | GRMZM2G077208    | Ribosomal protein 60S                                                         | 2.98  | 5.09E-36 |
|                             |          | GRMZM2G105712    | Ribosomal protein 60S                                                         | 2.15  | 6.90E-06 |
|                             |          | GRMZM2G032315    | Ribosomal protein 60S                                                         | 2.11  | 3.39E-14 |
|                             |          | GRMZM2G320497    | Glutathione S-transferase                                                     | 2.13  | 4.72E-04 |
| GO:0045735                  |          |                  |                                                                               |       |          |
| Nutrient reservoir activity | 2.90E-11 | GRMZM2G078441    | Cupin 1                                                                       | -3.64 | 1.64E-42 |

|                  |                           |         |           |
|------------------|---------------------------|---------|-----------|
| GRMZM2G008341    | Zein seed storage protein | -4.00   | 8.74E-17  |
| GRMZM2G161097    | Cupin 1                   | -3.46   | 7.01E-04  |
| GRMZM2G045387    | Zein seed storage protein | -3.87   | 2.72E-256 |
| GRMZM2G034724    | Cupin 1                   | -0.19   | 2.57E-18  |
| GRMZM2G160739    | Zein seed storage protein | -3.83   | 0.00E+00  |
| GRMZM2G044152    | Zein seed storage protein | -3.68   | 0.00E+00  |
| AF546187.1_FG007 | Zein seed storage protein | -7.54   | 0.00E+00  |
| AF546187.1_FG002 | Zein seed storage protein | -8.52   | 2.99E-18  |
| AF546187.1_FG001 | Zein seed storage protein | -9.86   | 0.00E+00  |
| GRMZM2G088441    | Zein seed storage protein | -3.91   | 0.00E+00  |
| GRMZM2G044625    | Zein seed storage protein | -3.51   | 0.00E+00  |
| GRMZM2G088273    | Zein seed storage protein | -22.58  | 2.29E-20  |
| GRMZM2G053120    | Zein seed storage protein | -4.68   | 3.80E-09  |
| AF546188.1_FG005 | Zein seed storage protein | -5.28   | 0.00E+00  |
| AF546188.1_FG006 | Zein seed storage protein | -5.72   | 1.19E-157 |
| AF546188.1_FG007 | Zein seed storage protein | -5.77   | 0.00E+00  |
| AF546188.1_FG001 | Zein seed storage protein | -6.99   | 0.00E+00  |
| AF546188.1_FG003 | Zein seed storage protein | -3.30   | 1.64E-11  |
| GRMZM2G138689    | Gliadin/LMW glutenin      | -14.87  | 0.00E+00  |
| GRMZM2G353268    | Zein seed storage protein | -4.32   | 0.00E+00  |
| GRMZM2G059620    | Zein seed storage protein | -5.22   | 0.00E+00  |
| GRMZM2G026703    | Cupin 1                   | -364.00 | 4.50E-219 |
| GRMZM2G008913    | Zein seed storage protein | -4.07   | 0.00E+00  |
| GRMZM2G026939    | Zein seed storage protein | -3.34   | 1.93E-265 |
| GRMZM2G067919    | Cupin 1                   | -4.12   | 1.04E-39  |
| GRMZM2G388461    | Zein seed storage protein | -4.60   | 2.01E-239 |
| GRMZM2G346897    | Zein seed storage protein | -3.83   | 0.00E+00  |
| GRMZM2G346895    | Zein seed storage protein | -3.80   | 3.06E-79  |
| GRMZM2G397687    | Zein seed storage protein | -4.29   | 0.00E+00  |
| GRMZM2G088365    | Zein seed storage protein | -107.06 | 0.00E+00  |

**Table S2. Primers used in this work.**

|         | Primer name | Sequence                        |
|---------|-------------|---------------------------------|
| Mapping | AC196023.10 | F:5'-TGTAATTGCGTTTGATTCGT-3'    |
|         |             | R:5'-AAAACGATACCTGGGAAATTAT-3'  |
|         | AC209356.12 | F:5'-AAACTAATCCTAAGAGTGACGA-3'  |
|         |             | R:5'-CTCCCAGTTCATAGCTACAC-3'    |
|         | AC204567.28 | F:5'-TGACGATGGTCCTTGATTCT-3'    |
|         |             | R:5'-CCGTGGTCCGTAGCTC-3'        |
|         | 2G471304.4  | F:5'-TTGATGACTATTGAGGCAGT-3'    |
|         |             | R:5'-TGAAATAGGGAAGACTGGGA-3'    |
|         | 2G168984.7  | F:5'-GTTTCACTTTCTACCCTCGC-3'    |
|         |             | R:5'-ATTAATTAAGAAGTGCAGCAGGA-3' |
|         | AC202457.4  | F:5'-CAGTAGTGGAGTTCCTTTGG-3'    |
|         |             | R:5'-ACGTACGGACATAGACCAAT-3'    |

|                                     |                                         |                                 |
|-------------------------------------|-----------------------------------------|---------------------------------|
| <b>Vector construction</b>          | 2G087226.7                              | F:5'-ACAGATGCGATTGTGACTTGC-3'   |
|                                     |                                         | R:5'-TCCTGTCATCAGGAACCAAC-3'    |
|                                     | Gateway                                 | F:5'-CACCATGCCGCCCATGGTCTCG-3'  |
|                                     |                                         | R:5'-GAAAGTCATGGAAGAACTTCTGC-3' |
| <b>Genotyping</b>                   | <i>BAR</i>                              | F:5'- GAAGTCCAGCTGCCAGAAAC-3'   |
|                                     |                                         | R:5'- GCACCATCGTCAACCACTAC-3'   |
|                                     | <i>Dek10</i>                            | F:5'- ACAGATGCGATTGTGACTTGC-3'  |
|                                     |                                         | R:5'- TCCTGTCATCAGGAACCAAC-3'   |
| <b>Real-time PCR</b>                | <i>Dek10</i>                            | F:5'-GCCAACTCCCTCTTCCGC-3'      |
|                                     |                                         | R:5'-CGAGGCAGTGGGACAGAAC-3'     |
|                                     | <i>cox2</i>                             | F:5'-AGACGCAGCAACACCTATGA-3'    |
|                                     |                                         | R:5'-CCATAAAGCGCGAACCAACA-3'    |
|                                     | GRMZM2G125669 (AOX2)                    | F:5'-ACAGGCTGCTTCCAACCATA-3'    |
|                                     |                                         | R:5'-GCTTCCAGAAACCCAGGAGG-3'    |
|                                     | GRMZM2G010933 (Cytochrome c oxidase 17) | F:5'- AACGAAAGTCGGCAGTTCT-3'    |
|                                     |                                         | R:5'- TTCACAGCTGGGGTTTCAGG-3'   |
|                                     | GRMZM2G115049 (Porin)                   | F:5'- ATCGGGAAGAAGGCCAGAGA-3'   |
|                                     |                                         | R:5'- AGTAATGGCAGCTCCGTTGG-3'   |
| GRMZM2G064600 (Translocase subunit) | F:5'- GATACCTCCCCGCCCTCTAA-3'           |                                 |
|                                     | R:5'- ATAACATCCACGCGACGAAA-3'           |                                 |
| GRMZM2G069229 (ATPase)              | F:5'- ACGGAAGCCGTCTGAAGATT-3'           |                                 |
|                                     | R:5'- GGTAGCCCGTGACGGTAAAA-3'           |                                 |
| <b>RNA editing analysis</b>         | <i>nad3</i>                             | F:5'-CTTTCCTATGTCCTTCCCC-3'     |
|                                     |                                         | R:5'-GAGGAGAGCGAGAGAACGAA-3'    |
|                                     | <i>nad4L</i>                            | F:5'-CTGACATTCCATGTTTCCGA-3'    |
|                                     |                                         | F:5'-GAAGAGAACGAAAGGAGAACAGA-3' |
|                                     | <i>nad6</i>                             | F:5'-TGAAAAACCAAACCCACAT-3'     |
|                                     |                                         | R:5'-CAAGTCCCTTGGCGTAGTC-3'     |
|                                     | <i>nad9</i>                             | F:5'-AGCAAGAAGCGGAACAAAA-3'     |
|                                     |                                         | R:5'-TATTGATTTGTCCCTCCCC-3'     |
|                                     | <i>nad7</i>                             | F:5'-GTTTTGGCTCGCAATAAAGC-3'    |
|                                     |                                         | R:5'-CAGGTGGGACAAGCTCTAGG-3'    |
|                                     | <i>nad4</i>                             | F:5'-CAGTCACCCGGAGAAGATTT-3'    |
|                                     |                                         | R:5'-TAATTTGGCGCCTGATTGAC-3'    |
|                                     | <i>nad1</i>                             | F:5'-GGCCCGATCATGAGTGAATA-3'    |
|                                     |                                         | R:5'-GCCCCCTTCAGAAGAACTT-3'     |
|                                     | <i>nad2</i>                             | F:5'-GACGGAGGAGAGGAAATGAA-3'    |
|                                     |                                         | R:5'-GCAGTCCACCCTTTCTTTGA-3'    |
|                                     | <i>nad5</i>                             | F:5'-CGCTCGAACATTGTCTGATT-3'    |
|                                     |                                         | R:5'-GTCCTGGCAAGCTCCTACAG-3'    |
| <i>rps3</i>                         | F:5'-GCAGAAAGGGGCAAAAGTAA-3'            |                                 |
|                                     | R:5'-TCGCGACCCCTACTACATCT-3'            |                                 |
| <i>rps13</i>                        | F:5'-TCATGATGATTAAGGGAAGAGTGA-3'        |                                 |
|                                     | R:5'-TTGAATTGAACAGTGTGATTGAT-3'         |                                 |
| <i>rps12</i>                        | F:5'-CTAGCTGCTTCCATATCGCC-3'            |                                 |
|                                     | R:5'-CGGATCGGGAGTAACCACTA-3'            |                                 |
| <i>rps7</i>                         | F:5'-TTCGTTGAAAAACCTACGC-3'             |                                 |

|  |            |                                                                |
|--|------------|----------------------------------------------------------------|
|  |            | R:5'-ATGAGGAAGGCCGATTTTCT-3'                                   |
|  | rps4       | F:5'-AGAGTTGGGTTTCGATTCCCT-3'<br>R:5'-AGCGACTAGGCCGATCTTTT-3'  |
|  | rps2B      | F:5'-TCCATGGACCCACGTAAAAT-3'<br>R:5'-GGCCCCTCTCTGATAAGGAA-3'   |
|  | rps2A      | F:5'-CAGGAAAGATATTTGCCCA-3'<br>R:5'-CCTGTATCTCCGAAACGAA-3'     |
|  | rps1       | F:5'-AAGGTGGGCTTCGGATTATT-3'<br>R:5'-TCTTCAGTTTTACGCTTACGCT-3' |
|  | rpl16      | F:5'-GGTTTTTCCCCACTAACCA-3'<br>R:5'-GGGTGCGGAAATAGCTAGAA-3'    |
|  | atp1       | F:5'-CGTTGCTGGTGAAGAAGCAT-3'<br>R:5'-AAAAGCGGATTTATCCATCG-3'   |
|  | atp4       | F:5'-AGCCACGTGCTCTAATCCTC-3'<br>R:5'-TCCCTTCTCTTGGAGCAGA-3'    |
|  | atp6       | F:5'-CCAAGTCTCTTTGGGAGCA-3'<br>R:5'-GGCTCCTCGTTTTTATGCAA-3'    |
|  | atp8       | F:5'-GGCAAGGATCCTCAGTCCTA-3'<br>R:5'-GAGGGTTGGTTTGATTGGAA-3'   |
|  | atp9       | F:5'-AGGGCCTCGTCATCTCTAT-3'<br>R:5'-TAGTTGCGAAGGAAAAGCGT-3'    |
|  | ccmB       | F:5'-AGCCGTGCAAGTGAATGAAT-3'<br>R:5'-AACGGCTTTTCCATGACTTG-3'   |
|  | ccmC       | F:5'-ACTTGCAAGGCAAGGAAAAA-3'<br>R:5'-CCATGGATGCTTTAGCGAGT-3'   |
|  | ccmFC      | F:5'-GAGAAGCTCAAATCGAACGG-3'<br>R:5'-CGCAGCCACTATTTGACTC-3'    |
|  | ccmFN      | F:5'-TGAAGATTGTAAGGCGTTTCC-3'<br>R:5'-GGATCATCCTGTGGTTACCG-3'  |
|  | cob        | F:5'-ATCAAGGCAAGGGGTAAAT-3'<br>R:5'-GGTGTGATCAGTCTCATCCG-3'    |
|  | cox1       | F:5'-GGCCCCTCTCTGATAAGGTT-3'<br>R:5'-GTAAAGCAAAGCCCAAACA-3'    |
|  | cox2       | F:5'-GTCCTACTTCTGGTCTGCC-3'<br>R:5'-GAGAATTGCATTTCCGCTTC-3'    |
|  | cox3       | F:5'-TCAATCCACTTATTCGTTCCC-3'<br>R:5'-GTTTACATACAACCGGGGCA-3'  |
|  | Mat-r      | F:5'-AACGCCTGTTTCGCTAAAATC-3'<br>R:5'-AGGCTTTGCTCCCCTTTTT-3'   |
|  | mttB(orfX) | F:5'-TTGGTTTAGAATTGCTCGGG-3'<br>R:5'-AGGGGAACCCACCGAC-3'       |
|  | rps12-ct   | F:5'-TGTACGGTCTGTAGAGGGACA-3'<br>R:5'-TCCGTTTTCTTTTATAAGGGC-3' |
|  | rps7-ct    | F:5'-TTGAACCTCTTTCACGCTCA-3'<br>R:5'-TTCCGATCGAGATGTATGGA-3'   |
